# Supplementary material
Source: Research Square preprint supplement (doi:10.21203/rs.3.rs-9024733/v1)
Supplement: Supplementary file 1 [file 95039f6ca15629d2510b1baf.xlsx]

## Sheet: Sheet1
序号	分组	检查号	门诊号	住院号	患者编号	右后路						左后路
						内切圆直径	进针点距椎板平面距离	进针点距正中矢状面距离	钉道长度	过圆心轴线与矢状面角度	过圆心轴线与椎体下缘角度	内切圆直径	进针点距椎板平面距离	进针点距正中矢状面距离	钉道长度	过圆心轴线与矢状面角度	过圆心轴线与椎体下缘角度
1	男	LY3354152	2023012600308		JD1901545	7.74	2.65	20.26	24.73	29.4	46.8	7.56	2.78	19.64	24.11	28.9	46.1
2		LY3935872	2024090652952		JD2232078	7.76	2.25	21.6	26.7	32.9	47.1	8.24	2.45	18.02	25.7	21.6	40
3		LY3422782	2023040900960		JD1939881	9.2	3.95	18.68	26.26	18.5	30.4	8.64	4.01	18.02	26.03	25.1	32.1
4		LY3423035	2023040901491		JD1939996	7.32	2.48	17.79	25.97	34.4	33.6	7.7	2.56	18.98	24.77	32.6	34.1
5		LY3423142	2023041000002		JD1940084	8.7	4.11	17.19	27.72	19.9	39.2	8.46	5.77	18.31	27.02	21.3	38.3
6		LY3449729	2023050901362		JD1955660	7.94	3.65	19.23	24.99	24.5	35.5	6.9	3.77	19.33	25.03	23.4	35.2
7		LY3462134	2023052100960		JD1962555	7.82	3.68	19.4	30.53	20.2	39.8	7.62	3.91	19.77	29.64	21.5	38.7
8		LY3473636	2023060102193		JD1969072	8.14	4.21	19.12	23.02	20.4	39.2	8.1	4.02	18.32	23.11	21.4	40.2
9		LY3478143	2023060602269		JD1971620	6.4	1.93	18.74	27.7	14.8	41.2	7.82	2.41	18.42	27.52	15.3	39.4
10		LY3914082		2432669	JD1974056	7.74	4.81	19.4	28.46	22.5	42.1	6.08	4.99	19.62	28.43	22.1	40.3
11		LY3496217		23190161	JD1978093	7.6	5.03	18.25	21.74	25	34.6	7.42	4.81	18.86	22.05	24.7	34.1
12		LY3495394	2023062401174		JD1981473	5.98	3.5	19.82	24.45	23.8	31.8	6	3.04	19.99	23.73	23.2	32.2
13		LY3535452	2023080351963		JD2004155	8.04	3.13	17.75	29.53	11	50.4	9.02	3.52	16.99	28.88	11.5	48.4
14		LY3538888		23254811	JD2006001	6.06	3.99	18.63	22.92	28.6	35.7	5.78	4.04	19.03	23.17	29.4	36.7
15		LY3577298	2023091551100		JD2028303	9.72	4.13	20.55	24.21	30.7	27.5	8.42	3.73	19.64	23.73	29.7	28.5
16		LY3974571		2441008	JD2252771	8.92	4.09	20.59	27.28	26	48.6	9.42	3.71	20.31	26.84	25.3	47.9
17		LY3605514	2023101551567		JD2045157	9.12	3.9	19.85	28.73	20.3	47.5	8.46	3.62	19.48	28.51	21.2	47.2
18		LY3637270	2023111551225		JD2063191	8.72	3.02	20.29	24.21	10.7	47.6	8.1	3.33	20.51	24.04	11.2	47.2
19		LY3649102	2023112753207		JD2069882	8.28	3.56	19.53	28.14	29.9	43.1	7.98	3.21	19.42	27.05	28.5	42.7
20		LY3652030	2023113052172		JD2071585	7.66	1.73	19.44	31.33	25.5	36.3	6.66	1.73	19.77	29.74	25.3	37.1
21		LY3655992	2023120453748		JD2073844	9.02	1.44	16.66	25.08	27.5	35.3	9.44	1.84	16.97	24.83	27.1	35.8
22		LY3657264	2023120553545		JD2074536	8.58	4.17	19.84	26.25	23.2	43.5	8.08	3.88	19.99	25.95	23.9	42.8
23		LY3667255	2023121553135		JD2080015	8.78	2.89	22.13	25.14	23.6	42.6	8.04	3.13	21.73	25.05	23.1	41.2
24		LY3692793	2024011252865		JD2094152	8.6	3.97	20.53	24.63	28.6	37.7	8.22	3.33	20.64	24.85	28.4	38.4
25		LY3751453	2024031854138		JD2127367	7.98	2.03	20.6	27.19	34	43.5	8.06	2.15	20.54	26.99	34.7	42.7
26		LY3783925	2024041852893		JD2146167	5.62	5.97	18.73	26.61	22.8	45.1	5.98	5.36	18.37	26.31	21.5	46.2
27		LY3788825	2024042351784		JD2149131	6.76	4.76	18.75	26.55	26.2	42.1	7.62	4.81	18.98	26.06	26.4	43.2
28		LY3826868	2024052853243		JD2170592	6.22	3.92	16.93	24.25	15.2	34.8	6.96	3.34	17.42	24.06	15.8	35.1
29		LY3840130	2024061053372		JD2178243	8.36	3.54	20.23	30.07	20.8	35.1	9.46	3.66	21.59	29.73	21.3	35.7
30		LY3903271	2024080653858		JD2213970	8.48	3.75	19.95	24.19	20	38	8.12	3.77	18.58	24.83	20.6	37.1
31		LY3904355	2024080753705		JD2214559	9.62	2.84	18.68	20.83	19.1	35.6	9.98	2.92	18.63	21.32	19.5	36.1
32		LY4247028	2025062553384		JD2217937	6.48	2.73	20.21	26.46	31.1	44.7	7.54	2.88	20.44	25.95	30.7	45
33		LY3911139	2024081452351		JD2218449	8.26	4.24	19.95	27.15	26.5	32.1	9.66	4.02	19.91	26.82	27.5	32.6
34		LY3919228	2024082153924		JD2222888	8.6	2.68	20.16	21.69	27.9	37.4	7.48	2.42	20.37	21.62	27.1	38.6
35		LY3920888	2024082351551		JD2223727	8.82	2.78	18.26	21.1	29.2	36.6	9.82	2.51	17.77	21.93	28.4	36.1
36		LY3940203		2436133	JD2233167	8.74	5.18	17.95	24.85	14	42.3	9.1	5.24	17.97	24.41	15.3	41.2
37		LY3998053	2024110550979		JD2236384	8.58	6.12	23.25	32.45	28.1	53.1	8.24	6.01	22.75	31.98	27.9	52.5
38		LY3945783	2024091750015		JD2237767	8.56	3.2	17.87	23.38	27.1	39.7	8.1	3.03	18.3	23.34	27.6	38.9
39		LY3946126	2024091751526		JD2237925	7.8	3.61	20.54	26.41	23.6	39.8	7.42	3.88	19.53	26.61	23.6	38.7
40		LY4000041	2024110653467		JD2267515	5.3	1.76	16.05	22.56	22.6	31.8	5.1	1.55	16.11	22.53	24.8	32.6
41		LY4003138	2024110953270		JD2269153	6.06	5.03	17.92	19.57	26	22.4	8.02	4.99	17.42	19.31	25.4	23.6
42		LY4203078	2025051852928		JD2376910	6.9	4.15	17.94	23.45	33.9	32	7.78	4.05	17.82	24.31	31.8	32.5
43		LY4208981	2025052352353		JD2379949	7.12	3.25	17.77	23.82	20.7	24.4	8.42	3.33	17.34	23.73	21.7	24.7
44		LY3326087	2022120800876		JD1885199	8.74	4.54	18.28	25.31	21.5	26.8	9.44	4.01	18.36	25.61	22.6	26.8
45		LY4277596	2025072150902		JD2416878	7.14	2.66	18.61	29.35	22.5	35.5	6.42	2.53	18.62	28.31	21.9	34.7
46		LY3348171	2023011201447		JD1897942	7.42	2.04	17.37	20.89	27.7	30.8	8.82	2.16	17.09	21.62	27.5	30.1
47		LY3310465	2022112101341		JD1876597	6.22	2.35	19.61	24.31	33.8	24.4	6.46	2.11	19.53	24.06	31.2	24.7
48		LY4273311	2025071752022		JD2414632	6.78	4.07	19.54	26.21	31.5	26.4	7.12	3.82	18.53	22.86	30.3	26.8
49		LY4366137	2025100653806		JD2463071	5.02	2.07	18.23	22.6	21.7	33	5.22	2.14	18.92	21.83	21.6	34.2
50		LY4232127	2025061253590		JD2392435	6.1	2.4	17.53	23.39	23.3	34	7.44	2.05	18.52	23.27	23.7	34.9
51	女	LY3627142	2023110551019		JD1779430	5.58	1.85	19.42	19.57	27.4	21.5	5.98	1.99	18.43	19.42	27.9	21.7
52		LY3364560	2023020700611		JD1894170	7.1	3.59	14.61	24.91	22.5	32.9	6.22	3.04	14.52	24.71	23.1	32.7
53		LY3402287	2023031700896		JD1928559	5.64	2.29	16.94	20.46	23.1	27.4	5.82	2.34	16.42	21.62	22.7	28.5
54		LY3435547	2023042201459		JD1947144	6.5	2.69	19.83	24.15	30.4	28.1	8.54	2.88	19.42	23.73	29.6	28.9
55		LY3438561	2023042601825		JD1949004	8.64	3.68	16.24	28.21	13.1	43	9.32	3.04	16.42	28.71	14.2	42.7
56		LY3440285	2023042802210		JD1950104	4.86	4.45	16.91	23.03	26.6	32.4	6.9	4.55	16.55	23.33	27.4	31.8
57		LY3441898	2023050100696		JD1951212	5.38	3.63	17.95	27.73	24.9	24.5	5.54	3.77	18.03	27.04	24.1	24.8
58		LY3533976		23247591	JD2003248	3.28	4.41	16.38	26.2	17.1	38.8	3.98	4.88	17.04	25.71	17.9	38.2
59		LY3552515	2023082150726		JD2014017	5.48	5.95	19.18	27.14	28.1	33.7	5.76	5.03	18.42	26.44	27.5	34.1
60		LY3605001	2023101452867		JD2044806	5.56	2.15	18.95	23.5	25.5	38.2	4.82	2.33	18.63	23.93	24.3	37.5
61		LY3782833	2024041753568		JD2144186	3.1	2.61	18.67	28.8	33.3	39.1	3.76	2.55	18.53	27.19	32.7	38.6
62		LY3653469	2023120153317		JD2072449	5.46	3.23	17.68	24.33	20	40.2	6.12	3.27	17.88	23.04	19.6	38.9
63		LY3655059	2023120353027		JD2073314	2.74	3.51	17.95	24.23	22.8	34.5	3.76	3.66	17.42	24.06	21.5	34.9
64		LY3655404	2023120451217		JD2073494	4.24	5.16	19.49	25.58	28.9	38.3	5.46	5.06	18.99	26.83	27.4	37.3
65		LY3680931	2023123151519		JD2087563	5.1	3.27	18.51	22.08	32.6	39	5.32	3.05	18.03	22.91	31.8	38.5
66		LY3688979	2024010950552		JD2092051	5.42	4.39	15.22	22.98	20	29.4	4.62	4.02	15.82	22.82	20.5	28.4
67		LY3701121	2024012151385		JD2098819	4.36	5.43	17.42	18.81	22.8	46.5	4.86	5.21	17.52	19.63	22.6	45.9
68		LY3709520	2024013052306		JD2103415	4.78	4.52	19.38	23.16	26.8	40.2	4.22	4.29	19.44	23.73	26.1	38.9
69		LY3720591	2024021753069		JD2109804	4.78	2.95	20.67	24.41	29.5	44.7	4.62	2.71	20.61	24.16	28.7	43.2
70		LY3761483	2024032851819		JD2133085	1.76	3.74	17.33	20.71	32.6	41.4	2.02	3.08	17.42	21.81	31.8	40.9
71		LY3785327	2024041953387		JD2146985	4.7	2.82	17.16	22.28	26.3	35.2	4.62	2.63	17.06	22.53	25.7	35.1
72		LY3799683	2024050353325		JD2155318	4.02	5.86	17.1	30.03	26.8	38.8	4.62	5.31	17.03	29.61	26.1	37.5
73		LY3801419	2024050551081		JD2156346	3.68	2.04	16.59	20	24.4	33.2	3.68	2.83	17.11	20.71	24.3	32.8
74		LY3806836	2024051050949		JD2159269	3.7	5.16	18.5	25.17	24.7	33.2	3.08	4.89	17.43	25.47	24.9	32.6
75		LY3837531	2024060752676		JD2176792	3.78	3.89	19.07	22.93	27.4	37.5	3.16	3.21	18.73	23.04	27.5	37.1
76		LY3840773			JD2178614	4.04	2.68	14.56	27.28	15.4	39.1	4.62	2.71	15.32	26.78	15.8	38.1
77		LY3850830	2024062051332		JD2184399	4.46	3.18	15.76	22.89	18.7	42.9	5.08	3.04	15.92	23.05	17.1	41.9
78		LY3851770	2024062150358		JD2184886	4.5	4.45	18.2	23.57	22.9	42.2	5.32	4.02	18.34	23.88	23.1	41.6
79		LY3902358	2024080650684		JD2213475	5.28	3.61	15.78	24.31	20.2	33.3	5.64	3.77	15.2	24.83	21.6	32.6
80		LY3903143	2024080653067		JD2213869	5.42	3.74	16.09	23.72	12.6	49.8	5.86	3.21	16.39	23.94	12.8	47.5
81		LY3931101		2434332	JD2226236	4.7	1.17	19.42	24.37	25.7	32.6	4.22	1.06	19.77	25.16	25.8	31.8
82		LY3933140	2024090451886		JD2230605	5.96	1.8	17.77	26.07	24.1	37.8	7.12	1.62	17.28	26.93	23.7	36.1
83		LY3947220	2024091851347		JD2238515	3.88	3.12	16.05	23.68	19.3	48	4.9	3.07	16.32	24.16	18.7	47.3
84		LY3963120	2024100450639		JD2245708	4.6	2.75	16.64	22.87	24.2	33.7	4.26	2.53	16.83	22.74	23.7	32.9
85		LY3963440		2024100452612	JD2247501	5.62	2.51	15.85	23.23	16.2	29.1	4.88	2.21	15.92	23.16	16.8	28.5
86		LY3966577	2024100754346		JD2249248	4.1	1.77	18.74	20.62	22.9	41.1	5.82	2.22	18.38	21.72	23.9	40.1
87		LY3980449	2024101953482		JD2256796	2.82	4.94	17.16	21.7	14.4	36.5	3.04	4.65	17.03	21.53	14.2	35.1
88		LY3992676	2024103053483		JD2263449	3.04	3.03	18.68	23.74	24.9	20.3	2.46	3	18.71	24.84	23.8	21.9
89		LY4042248	2024121751389		JD2290048	2.36	3.75	19.28	25.17	28.6	38.8	2.34	3.68	19.04	23.81	27.7	36.2
90		LY4043392	2024121850944		JD2290605	4.9	2.62	16.12	20.75	26.4	30.4	4.84	2.12	16.29	21.63	25.8	29.6
91		LY4067532	2025011152634		JD2303390	8.12	3.51	19.65	25.13	12.2	42.6	7.96	3.19	20.43	24.89	10.5	45.7
92		LY4098249	2025021552538		JD2319870	6.5	3.13	19.93	24.92	18.6	48	6.3	2.97	22.51	26.87	16.6	50
93		LY4099198	2025021652701		JD2320436	7.94	3.19	19.85	24.51	16.1	40.8	7.74	3.26	18.47	23.87	19.5	39.7
94		LY4100284	2025021752854		JD2321031	7.8	3.26	18.82	20.69	16	56.8	7.2	3.45	19.87	22.84	20	49.9
95		LY4101599	2025021852733		JD2321728	5.4	3.57	19.03	23.68	16.1	38.6	5.94	3.12	20.68	21.31	15.9	42.8
96		LY4107616	2025022451024		JD2325074	6.52	2.53	19.79	22.68	22.8	43.5	6.22	3.13	21.76	22.95	21.7	39.8
97		LY4116145	2025030353772		JD2329760	6.82	2.87	16.07	22.57	18	46.6	7.44	2.98	17.87	21.73	19.4	43.9
98		LY4117900	2025030551083		JD2330716	5.56	3.11	20.06	24.85	17.9	35.7	6.38	3.54	19.56	25.29	19.9	40.5
99		LY4133011	2025031853181		JD2339023	6.12	3.14	18.68	22.8	11.7	36.5	5.78	2.78	20.34	25.31	15.8	39.9
100		LY4137802	2025032350525		JD2341593	6.9	3.08	21.22	21.45	17.4	42.3	7.94	3.61	19.98	19.39	20.4	43.8
					2
